# Supplementary material for: The protective mechanism of Dehydromiltirone in diabetic kidney disease is revealed through network pharmacology and experimental validation
Source: Front Pharmacol. 2023 Aug 23;14:1201296. doi: 10.3389/fphar.2023.1201296 (PMC10482231; doi:10.3389/fphar.2023.1201296)
Supplement: Supplementary file 2 [file Table1.XLSX]

## Sheet: Sheet1
Mol ID	Molecule Name	Pubchem Cid	InChIKey	MW	AlogP	Hdon	Hacc	OB (%)	Caco-2	BBB	DL	FASA-	HL
MOL001601	1,2,5,6-tetrahydrotanshinone	124416		280.34	2.98	0	3	38.75	0.96	0.39	0.36	0.33	18.05
MOL001659	Poriferasterol	5281330		412.77	7.64	1	1	43.83	1.44	1.03	0.76	0.22	5.34
MOL001771	poriferast-5-en-3beta-ol	457801		414.79	8.08	1	1	36.91	1.45	1.14	0.75	0	5.07
MOL001942	isoimperatorin	68081		270.3	3.65	0	4	45.46	0.97	0.66	0.23	0.27	-1.44
MOL002222	sugiol	94162		300.48	4.99	1	2	36.11	1.14	0.7	0.28	0.27	14.62
MOL000263	oleanolic acid	10494		456.78	6.42	2	3	29.02	0.59	0.07	0.76	0.25
MOL002651	Dehydrotanshinone II A	128994		292.35	4.22	0	3	43.76	1.02	0.52	0.4	0.33	23.71
MOL002776	Baicalin	64982		446.39	0.64	6	11	40.12	-0.85	-1.74	0.75	0.36	17.36
MOL000476	Physcion	10639		284.28	2.74	2	5	22.29	0.52	-0.4	0.27	0
MOL000569	digallate	341		322.24	1.53	6	9	61.85	-0.76	-1.52	0.26	0.43	5.29
MOL000006	luteolin	5280445		286.25	2.07	4	6	36.16	0.19	-0.84	0.25	0.39	15.94
MOL006824	α-amyrin	12358389		426.8	7.35	1	1	39.51	1.37	1.2	0.76	0.23	3.06
MOL007036	5,6-dihydroxy-7-isopropyl-1,1-dimethyl-2,3-dihydrophenanthren-4-one	11011966		298.41	4.38	2	3	33.77	1.19	0.8	0.29	0.29	14.91
MOL007038	Dehydromiltirone	3082765		280.39	4.29	0	2	24.57	1.14	0.74	0.26	0.36
MOL007041	2-isopropyl-8-methylphenanthrene-3,4-dione	135872		264.34	4.16	0	2	40.86	1.23	0.81	0.23	0.43	14.89
MOL007045	3α-hydroxytanshinoneⅡa	14626764		310.37	3.56	1	4	44.93	0.53	0.22	0.44	0.3	23.78
MOL007046	3beta-Hydroxytanshinone IIA	5318350		310.37	3.56	1	4	20.53	0.48	-0.13	0.45	0.32
MOL007048	(E)-3-[2-(3,4-dihydroxyphenyl)-7-hydroxy-benzofuran-4-yl]acrylic acid	10403222		312.29	3.21	4	6	48.24	0.18	-0.89	0.31	0.4	8.87
MOL007049	4-methylenemiltirone	14609851		266.36	4.33	0	2	34.35	1.25	0.87	0.23	0.38	14.6
MOL007050	2-(4-hydroxy-3-methoxyphenyl)-5-(3-hydroxypropyl)-7-methoxy-3-benzofurancarboxaldehyde	6709746		356.4	3.58	2	6	62.78	0.35	-0.73	0.4	0.24	7.89
MOL007051	6-o-syringyl-8-o-acetyl shanzhiside methyl ester		UYVOQGVJJDNTHV-FUMZBSRCSA-N	628.64	-1.13	5	16	46.69	-1.73	-2.08	0.71	0.22	9.94
MOL007054	(4bS,8aS,10S)-10-hydroxy-2-isopropyl-4b,8,8-trimethyl-5,6,7,8a,9,10-hexahydrophenanthrene-3,4-dione	14609850		316.48	3.6	1	3	26.25	0.41	-0.06	0.31	0.31
MOL007058	formyltanshinone	14609847		290.28	3.36	0	4	73.44	0.54	-0.28	0.42	0.41	24.12
MOL007059	3-beta-Hydroxymethyllenetanshiquinone	5318290		294.32	3.16	1	4	32.16	0.38	-0.48	0.41	0.36	22.51
MOL007061	Methylenetanshinquinone	105118		278.32	4.26	0	3	37.07	1.03	0.46	0.36	0.36	24.33
MOL007063	przewalskin a	16090912		398.49	2.25	1	6	37.11	-0.26	-0.69	0.65	0.38	1.63
MOL007064	przewalskin b	16102114		330.46	3.18	1	4	110.32	0.34	0.22	0.44	0.32	2.17
MOL007065	przewalskin c	11566132		330.51	5.02	2	3	20.34	1.07	0.69	0.35	0.23
MOL007067	Przewaquinone A	619402		310.37	3.57	1	4	21.91	0.38	-0.38	0.45	0.28
MOL007068	Przewaquinone B	622085		292.3	2.99	1	4	62.24	0.39	-0.45	0.41	0.38	24.94
MOL007069	przewaquinone c	126071		296.34	3.31	1	4	55.74	0.42	-0.3	0.4	0.32	23.7
MOL007070	(6S,7R)-6,7-dihydroxy-1,6-dimethyl-8,9-dihydro-7H-naphtho[8,7-g]benzofuran-10,11-dione	10470747		312.34	2.34	2	5	41.31	-0.06	-0.68	0.45	0.32	22.54
MOL007071	przewaquinone f	126073		312.34	2.07	2	5	40.31	-0.09	-0.9	0.46	0.29	22.45
MOL007077	sclareol	7060889		308.56	4.27	2	2	43.67	0.84	0.51	0.21	0.27	4.71
MOL007079	tanshinaldehyde	124268		308.35	3.83	0	4	52.47	0.57	-0.07	0.45	0.32	23.49
MOL007080	Tanshinol A	5321622		292.3	2.99	1	4	21.31	0.36	-0.51	0.41	0.38
MOL007081	Danshenol B	3083515		354.48	2.59	1	4	57.95	0.53	0.11	0.56	0.3	4.28
MOL007082	Danshenol A	3083514		336.41	2.01	1	4	56.97	0.33	-0.01	0.52	0.34	5.15
MOL007084	Aethiopinone	157301		296.44	5.62	0	2	21.02	1.26	0.9	0.21	0.38
MOL007085	Salvilenone	389885		292.4	4.26	0	2	30.38	1.46	1.07	0.38	0.35	20.81
MOL007088	cryptotanshinone	160254		296.39	3.44	0	3	52.34	0.95	0.51	0.4	0.29	17.3
MOL007090	dan-shexinkum a		MHCXKYJBQMJPRJ-SNVBAGLBSA-N	296.34	2.59	2	4	24.88	0.24	-0.45	0.3	0.4
MOL007091	dan-shexinkum b	5320113		280.34	3.74	1	3	21.67	0.83	0.18	0.26	0.42
MOL007092	dan-shexinkum c	5320114		252.28	3.04	1	3	22.71	0.75	0.03	0.21	0.44
MOL007093	dan-shexinkum d	124307626		336.41	2.83	1	4	38.88	0.67	-0.15	0.55	0.35	30
MOL007094	danshenspiroketallactone		RHNCMDZNEAIYJX-ADLMAVQZSA-N	282.36	3.24	0	3	50.43	0.88	0.51	0.31	0.34	15.19
MOL007096	daucosterol	12309067		576.95	6.34	4	6	20.63	-0.07	-0.77	0.63	0.22
MOL007098	deoxyneocryptotanshinone	15690458		298.41	4.32	1	3	49.4	0.85	0.24	0.29	0.3	27.17
MOL007099	dihydroisotanshinoneⅠ	11778300		278.32	3.01	0	3	20.91	0.92	0.2	0.36	0.41
MOL007100	dihydrotanshinlactone		ABYLBRBPUQGWOU-JTQLQIEISA-N	266.31	2.77	0	3	38.68	1.26	0.81	0.32	0.38	5.42
MOL007101	dihydrotanshinoneⅠ	40785034		278.32	2.86	0	3	45.04	0.95	0.43	0.36	0.4	18.32
MOL007105	epidanshenspiroketallactone	102004791		284.38	2.37	0	3	68.27	0.9	0.61	0.31	0.33	1.77
MOL007106	ethyl lithospermate		VLGXWXKZPANVOR-AMWHVFNNSA-N	502.55	5.05	2	8	26.37	-0.09	-0.74	0.82	0.43
MOL007107	C09092	442027		286.5	5.98	1	1	36.07	1.63	1.54	0.25	0.25	-0.16
MOL007108	isocryptotanshi-none	626608		296.39	3.59	0	3	54.98	0.93	0.34	0.39	0.3	31.92
MOL007110	isotanshinone iib	184102		310.37	3.57	1	4	21.07	0.38	-0.33	0.45	0.28
MOL007111	Isotanshinone II	626354		294.37	4.66	0	3	49.92	1.03	0.45	0.4	0.3	24.73
MOL007112	Isotanshinone I	623940		276.3	4.08	0	3	29.72	1.01	0.19	0.36	0.41
MOL007115	manool	3034394		304.57	5.5	1	1	45.04	1.28	1.16	0.2	0.28	5.81
MOL007118	microstegiol	403772		298.46	4.75	1	2	39.61	1.05	0.99	0.28	0.33	4.52
MOL007119	miltionone Ⅰ	5319835		312.39	3.33	1	4	49.68	0.35	-0.11	0.32	0.35	41.49
MOL007120	miltionone Ⅱ	5319836		312.39	2.14	1	4	71.03	0.62	0.03	0.44	0.28	2.91
MOL007121	miltipolone	10086184		300.43	2.74	1	3	36.56	0.5	0.17	0.37	0.3	1.7
MOL007122	Miltirone	160142		282.41	4.73	0	2	38.76	1.23	0.87	0.25	0.32	14.82
MOL007123	miltirone Ⅱ		PMUUBWUATBHZBL-KBPBESRZSA-N	272.32	0.77	1	4	44.95	0.04	-0.25	0.24	0.35	2.24
MOL007124	neocryptotanshinone ii	5320066		270.35	3.61	1	3	39.46	0.76	0.16	0.23	0.32	26.98
MOL007125	neocryptotanshinone	44425165		314.41	3.01	2	4	52.49	0.35	-0.13	0.32	0.28	14.46
MOL007126	przewalskin	14139389		272.42	3.85	1	2	25.18	1.24	0.98	0.28	0.28
MOL007127	1-methyl-8,9-dihydro-7H-naphtho[5,6-g]benzofuran-6,10,11-trione	10062187		280.29	3.21	0	4	34.72	0.5	-0.27	0.37	0.33	37.89
MOL007128	paramiltioic acid	15659904		332.43	2.68	1	5	25.92	0.05	-0.29	0.37	0.33
MOL007130	prolithospermic acid		AFZGSNJXNKOLMW-VFQAQYNWSA-N	314.31	2.77	4	6	64.37	0.1	-0.75	0.31	0.42	8.82
MOL007132	(2R)-3-(3,4-dihydroxyphenyl)-2-[(Z)-3-(3,4-dihydroxyphenyl)acryloyl]oxy-propionic acid	9841799		360.34	2.69	5	8	109.38	-0.33	-1.02	0.35	0.41	2.01
MOL007140	(Z)-3-[2-[(E)-2-(3,4-dihydroxyphenyl)vinyl]-3,4-dihydroxy-phenyl]acrylic acid	11602092		314.31	2.82	5	6	88.54	-0.09	-0.77	0.26	0.43	4.31
MOL007141	salvianolic acid g	154497410		340.3	2.2	4	7	45.56	-0.14	-0.97	0.61	0.45	2.4
MOL007142	salvianolic acid j		KPKHMGUZUPELJC-KDNJEYLZSA-N	538.49	3.78	6	12	43.38	-0.82	-2.14	0.72	0.44	5.77
MOL007143	salvilenone Ⅰ		HSCUXELINUHUKY-WFASDCNBSA-N	270.4	2.88	1	2	32.43	1.13	0.77	0.23	0.3	1
MOL007144	salviol	13966147		302.5	4.74	2	2	24.31	0.95	0.42	0.28	0.26
MOL007145	salviolone	10355691		268.38	4.05	1	2	31.72	1.04	0.72	0.24	0.36	0.33
MOL007146	salvipisone	821448		312.44	5.2	1	3	25.03	0.92	0.31	0.24	0.37
MOL007149	NSC 122421	94162		300.48	4.99	1	2	34.49	1.08	0.63	0.28	0.29	14.56
MOL007150	(6S)-6-hydroxy-1-methyl-6-methylol-8,9-dihydro-7H-naphtho[8,7-g]benzofuran-10,11-quinone	16730071		312.34	2.42	2	5	75.39	0.03	-0.74	0.46	0.29	23.45
MOL007151	Tanshindiol B	5321620		312.34	2.34	2	5	42.67	0.05	-0.63	0.45	0.33	22.25
MOL007152	Przewaquinone E	126072		312.34	2.34	2	5	42.85	-0.04	-0.65	0.45	0.32	22.44
MOL007153	Tanshilactone	5321617		264.29	4.23	0	3	25.11	1.26	0.75	0.32	0.4
MOL007154	tanshinone iia	164676		294.37	4.66	0	3	49.89	1.05	0.7	0.4	0.31	23.56
MOL007155	(6S)-6-(hydroxymethyl)-1,6-dimethyl-8,9-dihydro-7H-naphtho[8,7-g]benzofuran-10,11-dione	9926694		310.37	3.57	1	4	65.26	0.44	-0.31	0.45	0.29	23.48
MOL007156	tanshinone Ⅵ	98054352		296.34	2.44	2	4	45.64	0.48	-0.28	0.3	0.38	15.21
MOL007157	tanshinone i	114917		276.3	4.08	0	3	29.27	1.05	0.53	0.36	0.41
MOL000008	apigenin	5280443		270.25	2.33	3	5	23.06	0.43	-0.61	0.21	0.41
